# Supplementary material for: Epigenome-wide analysis in newborn blood spots from monozygotic twins discordant for cerebral palsy reveals consistent regional differences in DNA methylation
Source: PubMed Central journal article supplement (PMC5824607; doi:10.1186/s13148-018-0457-4), 2018-02-23

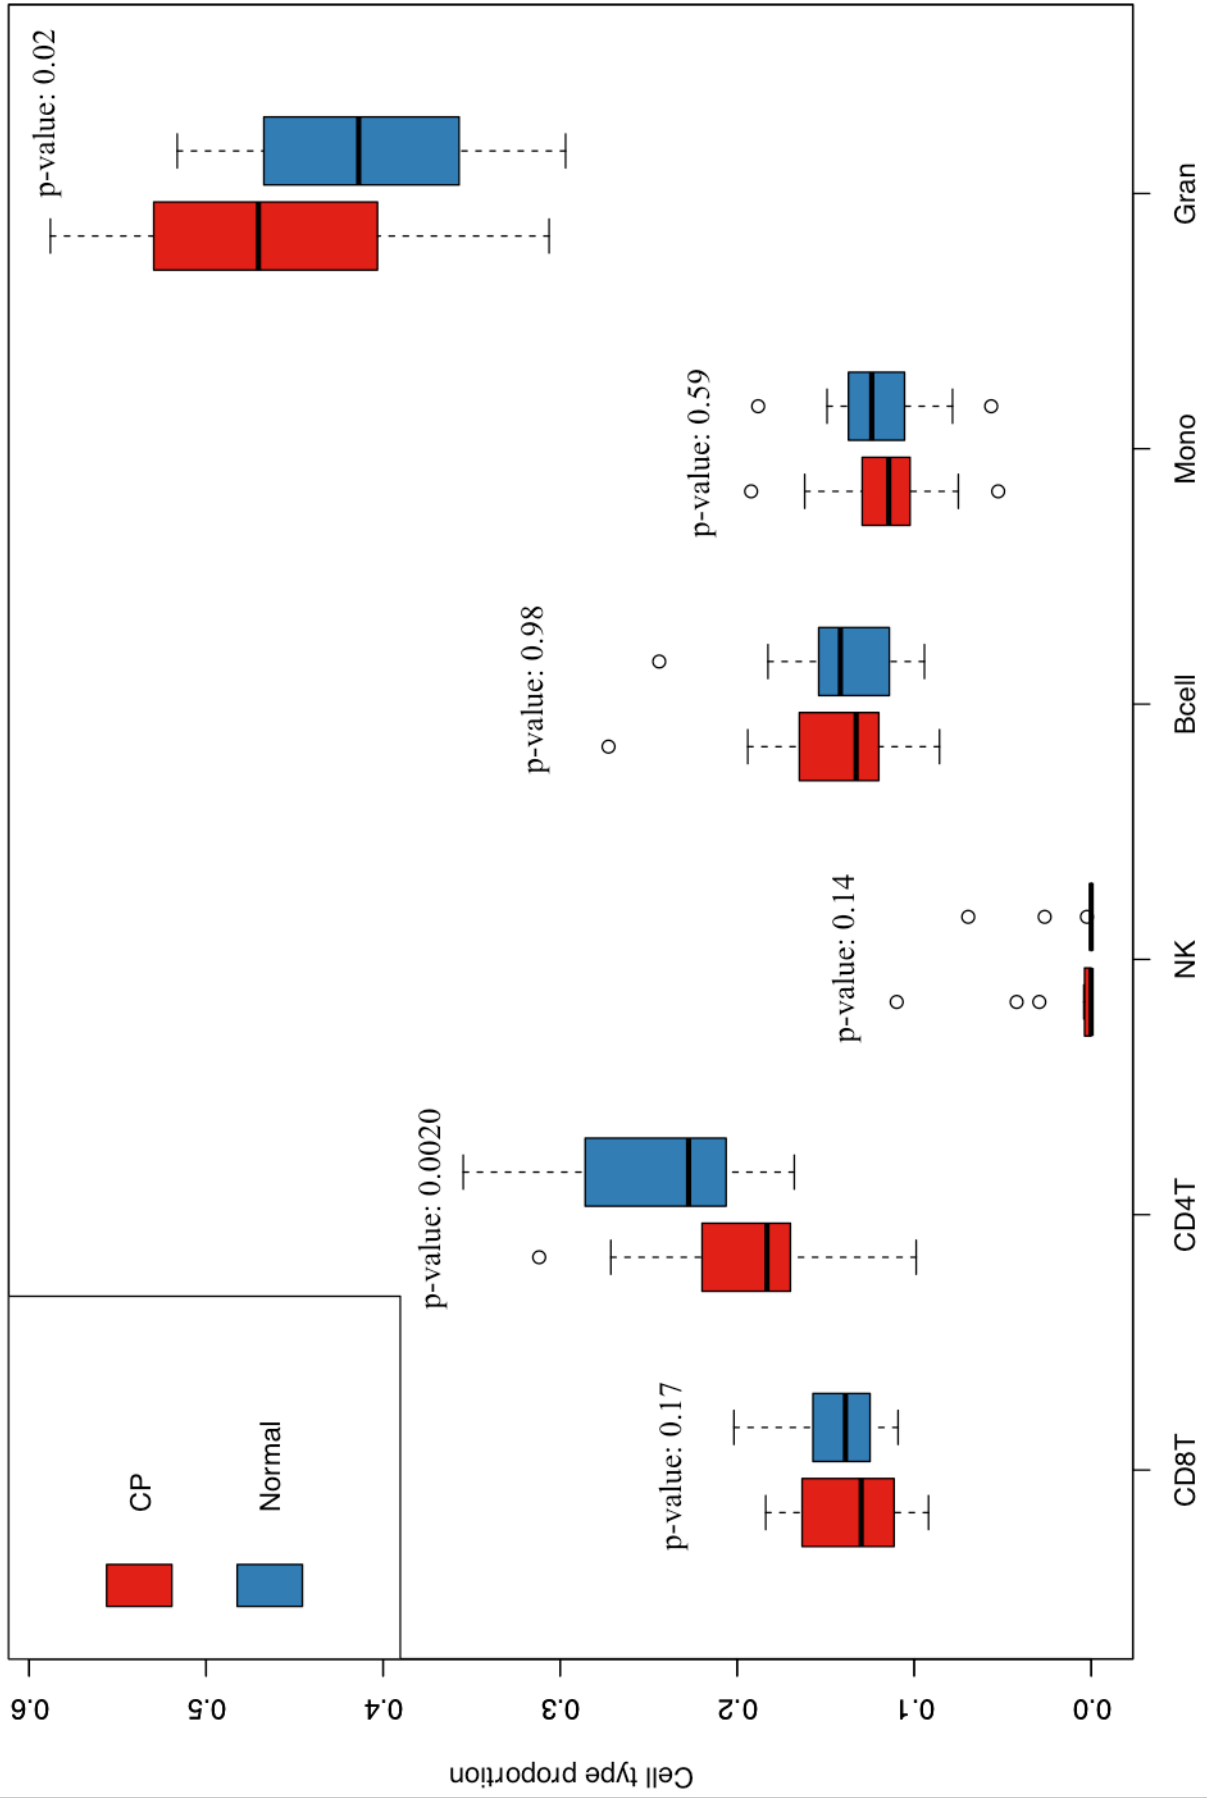

Supplement: 13148_2018_457_MOESM4_ESM.pdf [file 13148_2018_457_MOESM4_ESM.pdf]
